# Supplementary material for: Projecting changes in rainfall-induced landslide susceptibility across China under climate change
Source: Copernicus journal article supplement (doi:10.5194/egusphere-2025-3834), 2025-09-08
Supplement: Supplementary file 1 [file egusphere-2025-3834-supplement.pdf]

Supplementary information for

---

# Projecting changes in rainfall-induced landslide susceptibility across China under climate change

---

Jinqi Wang <sup>1,2</sup>, Hao Fang <sup>2,3,4</sup>, Kai Liu <sup>1,2\*</sup>, Yi Yue <sup>2</sup>, Ming Wang <sup>1,2</sup>, Bohao Li <sup>1,2</sup>, Xiaoyi Miao <sup>1,2</sup>

<sup>1</sup> Joint International Research Laboratory of Catastrophe Simulation and Systemic Risk Governance, Beijing Normal University, Zhuhai 519087, China

<sup>2</sup> School of National Safety and Emergency Management, Beijing Normal University, Beijing 100875, China.

<sup>3</sup> Zhejiang Institute of Geosciences, Hangzhou 310007, China

<sup>4</sup> Qiantang Institute of Geosciences, Hangzhou 310007, China

\*Corresponding author: Kai Liu ([liukai@bnu.edu.cn](mailto:liukai@bnu.edu.cn))

### Contents of this file

**Supplementary Table S1**

**Supplementary Figs. S1 to S5**

## Supplementary Table

**Supplementary Table S1:** Comparison of simulated precipitation and observed precipitation (The root mean square error (RMSE) for different models)

| ID | Model            | RMSE   | Mean RMSE (574.60) |
|----|------------------|--------|--------------------|
| 1  | IPSL-CM6A-LR     | 561.81 | RMSE ≤ Mean RMSE   |
| 2  | BCC-CSM2-MR      | 567.90 |                    |
| 3  | MPI-ESM1-2-HR    | 568.80 |                    |
| 4  | INM-CM5-0        | 568.86 |                    |
| 5  | ACCESS-CM2       | 569.07 |                    |
| 6  | NESM3            | 569.17 |                    |
| 7  | CanESM5          | 569.96 |                    |
| 8  | UKESM1-0-LL      | 570.11 |                    |
| 9  | CNRM-ESM2-1      | 570.14 |                    |
| 10 | KIOST-ESM        | 570.22 |                    |
| 11 | EC-Earth3        | 570.34 |                    |
| 12 | HadGEM3-GC31-LL  | 570.76 |                    |
| 13 | EC-Earth3-Veg-LR | 570.87 |                    |
| 14 | CNRM-CM6-1       | 571.33 |                    |
| 15 | MIROC-ES2L       | 571.73 |                    |
| 16 | FGOALS-g3        | 571.80 |                    |
| 17 | GISS-E2-1-G      | 572.02 |                    |
| 18 | NorESM2-LM       | 572.61 |                    |
| 19 | ACCESS-ESM1-5    | 573.04 |                    |
| 20 | INM-CM4-8        | 573.18 |                    |
| 21 | MRI-ESM2-0       | 575.14 | RMSE ≤ Mean RMSE   |
| 22 | IITM-ESM         | 576.75 |                    |
| 23 | MPI-ESM1-2-LR    | 577.33 |                    |
| 24 | GFDL-ESM4        | 577.53 |                    |
| 25 | NorESM2-MM       | 577.96 |                    |
| 26 | MIROC6           | 578.38 |                    |
| 27 | CESM2            | 579.36 |                    |
| 28 | CMCC-ESM2        | 580.93 |                    |
| 29 | TaiESM1          | 581.35 |                    |
| 30 | CMCC-CM2-SR5     | 596.12 |                    |
| 31 | KACE-1-0-G       | 607.04 |                    |

### Notes:

- (1) RMSE is calculated using the formula provided above, which compares simulated and observed annual precipitation totals for each model.
- (2) Mean RMSE is 574.60, representing the average RMSE across all models.

## Supplementary information

---

(3) Models with an  $RMSE \leq \text{mean RMSE}$  are considered to have better simulated accuracy relative to the overall dataset.

### Formula:

The RMSE is calculated as follows:

$$RMSE = \sqrt{\frac{1}{n} \sum_{i=1}^n (O_i - P_i)^2}$$

Where:

(1)  $n$  is the number of grid cells (pixels) in the raster,

(2)  $O_i$  is the observed precipitation at the  $i - th$  grid cell,

(3)  $P_i$  is the predicted precipitation at the  $i - th$  grid cell.

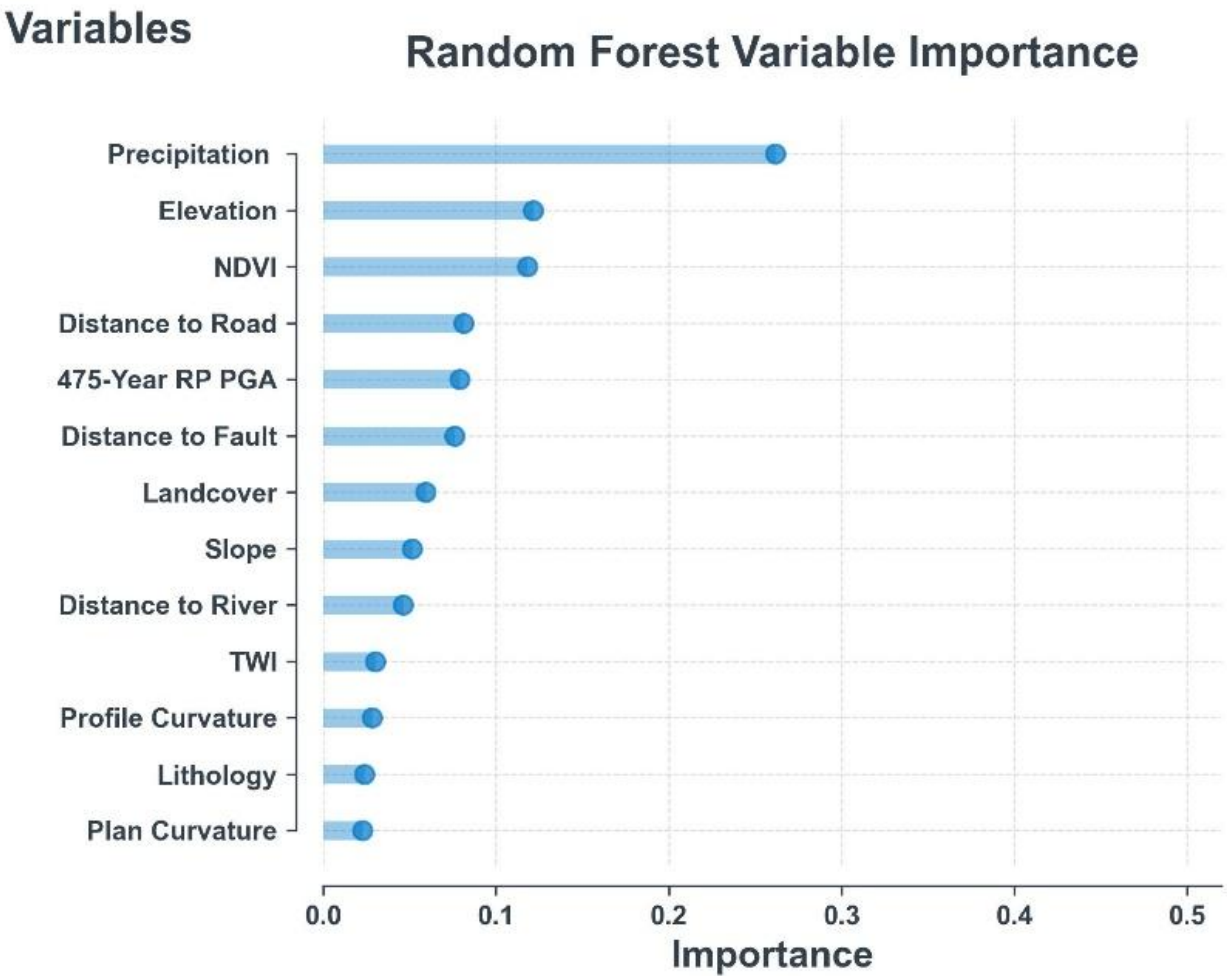

**Supplementary Fig. S1:** Relative importance of landslide conditioning factors as determined by the random forest (RF) model.

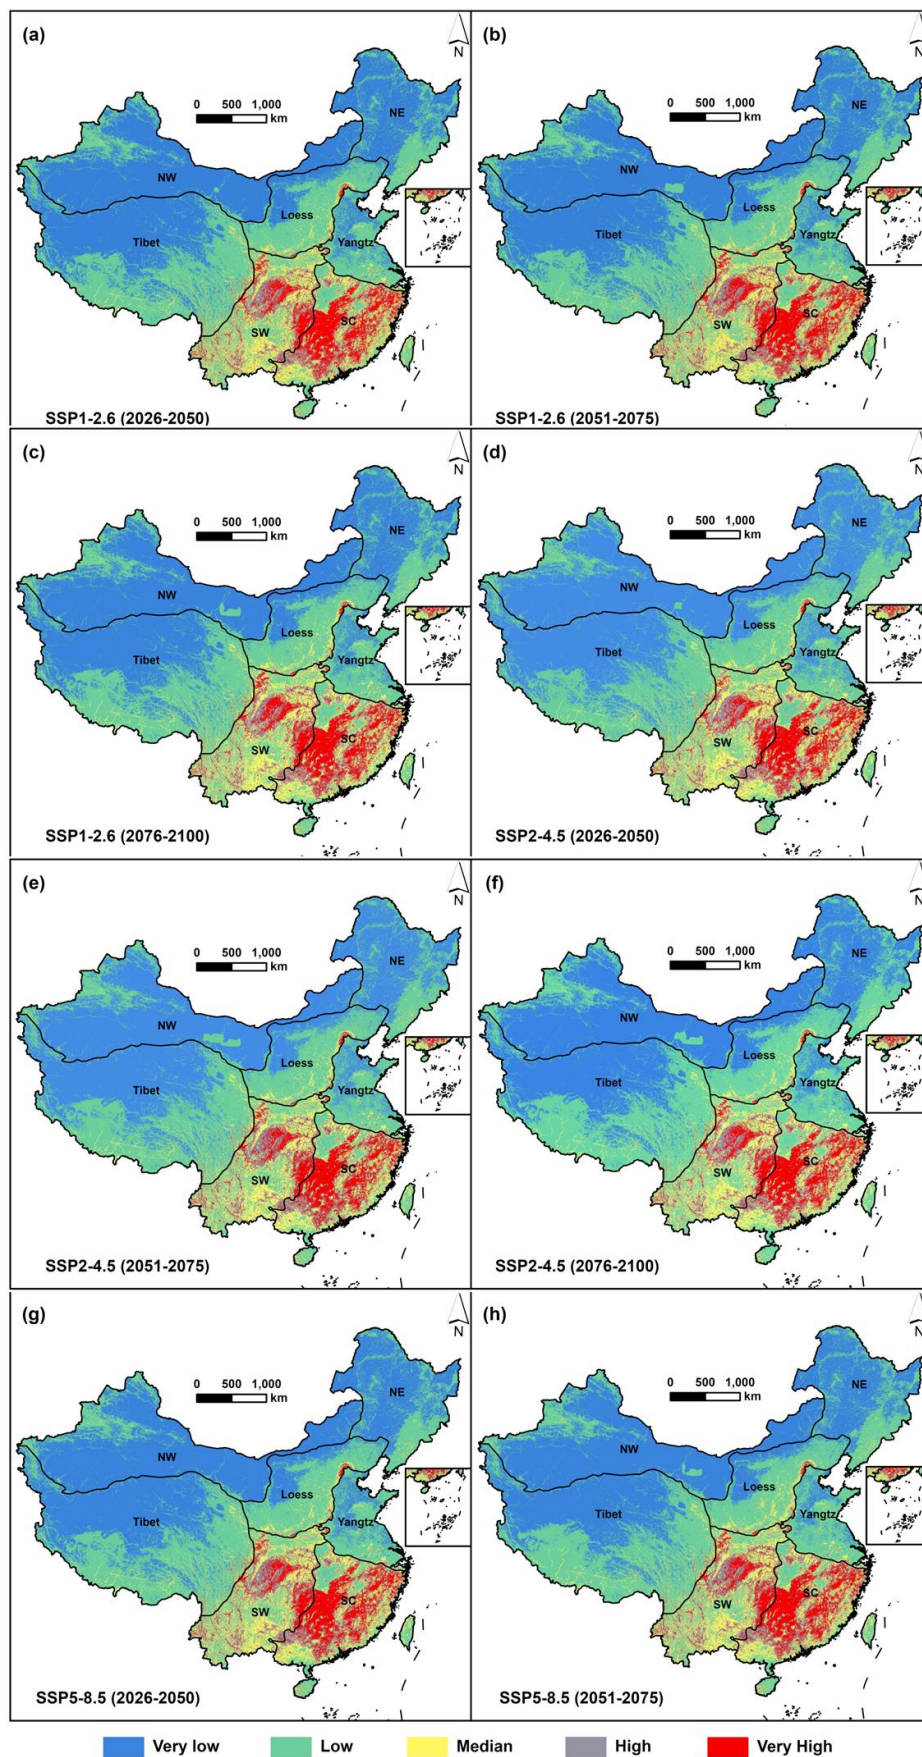

**Supplementary Fig. S2:** Spatial pattern of landslide susceptibility in China during future periods: near-term future (2026–2050), mid-term future (2051–2075), and long-term future (2076–2100) under SSP1-2.6, SSP2-4.5, and SSP5-8.5.

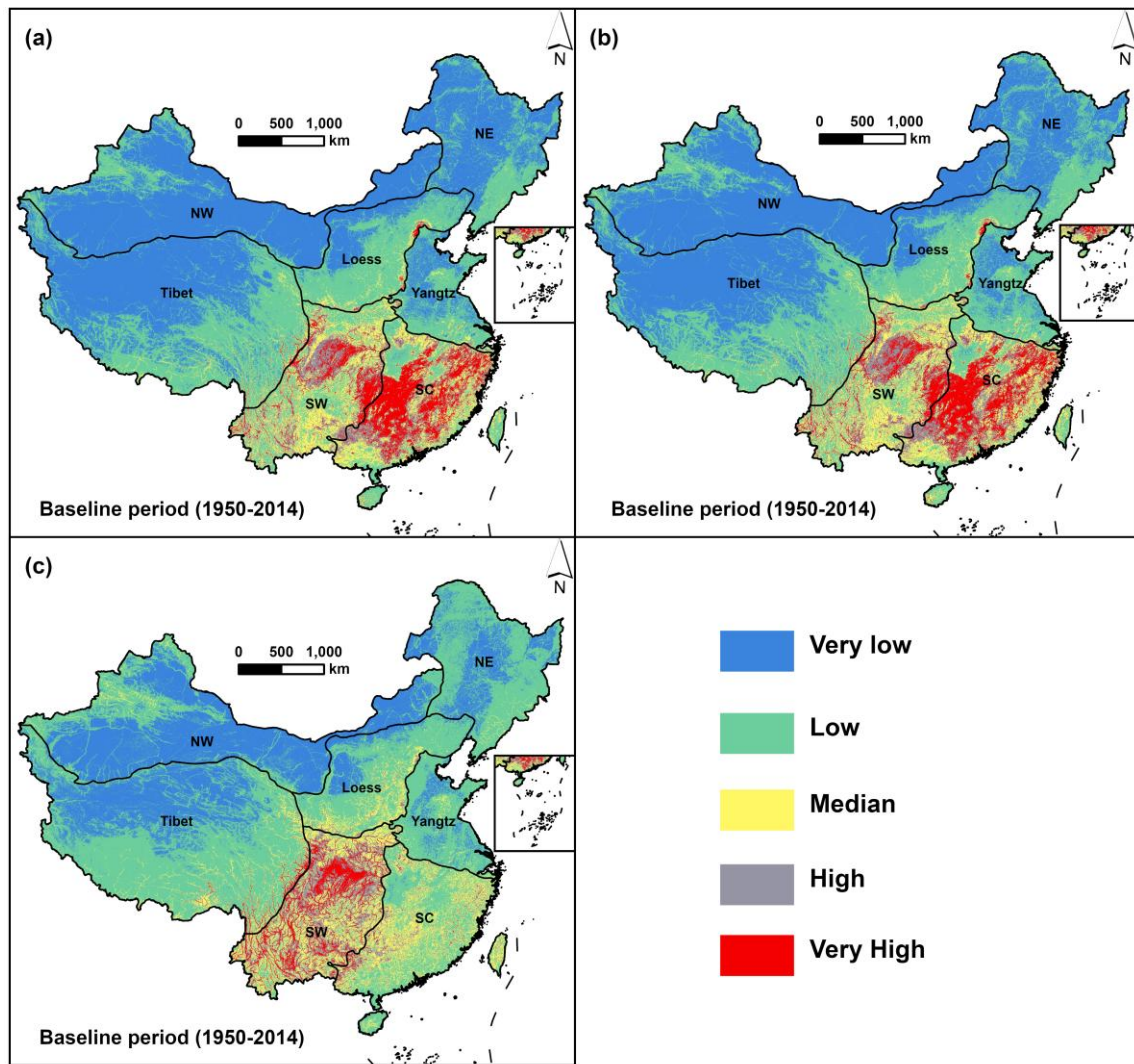

**Supplementary Fig. S3:** Landslide susceptibility maps illustrating the effect of thematic accuracy (i.e., completeness of small landslide records) on model results. (a) Baseline map constructed from the complete inventory (AUC = 0.97); (b) Map after removing 50% of the small landslides from the inventory (AUC = 0.97); (c) Map after completely excluding small landslides from the inventory (AUC = 0.96).



## Supplementary information

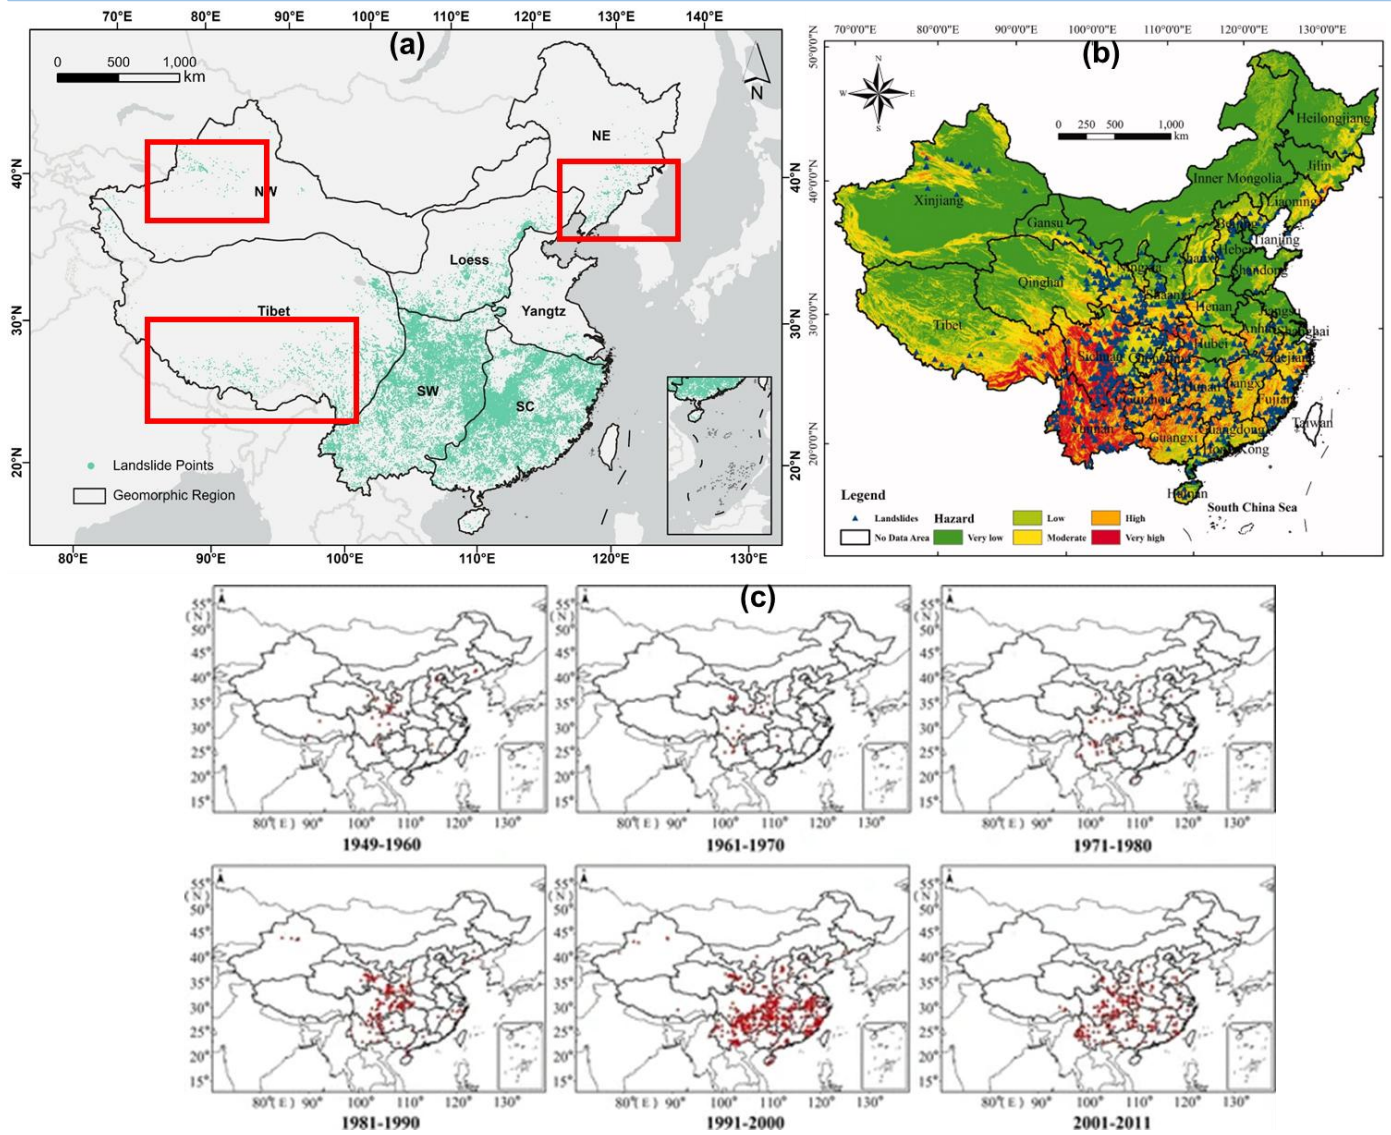

**Supplementary Fig. S4:** Comparison of landslide inventories. (a) Landslide points used in this study; (b) National-scale landslide inventory from Liu and Miao (2018); (c) National-scale landslide inventory from Liu et al. (2013).

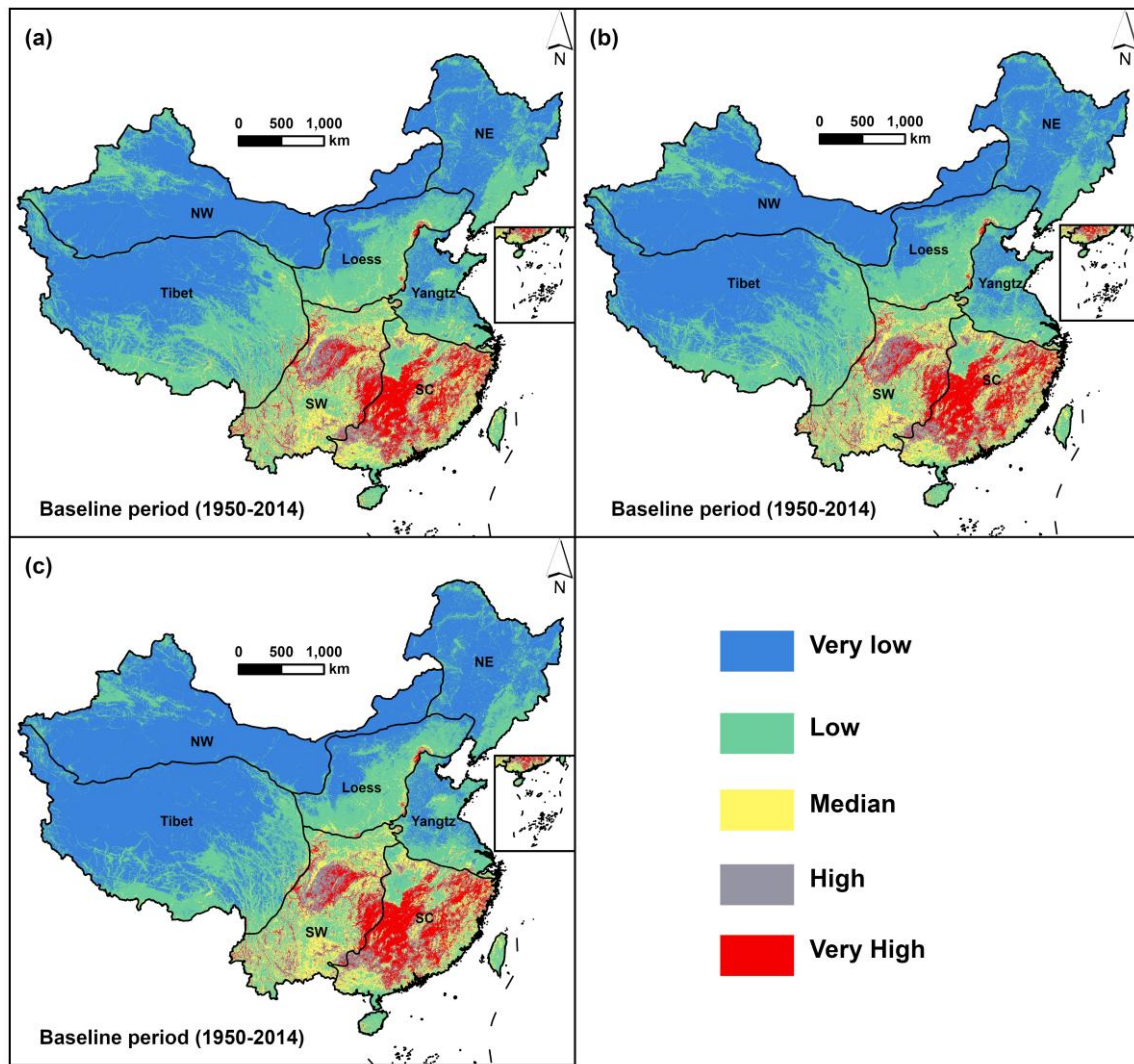

**Supplementary Fig. S5:** Landslide susceptibility maps generated from inventories with different levels of completeness in Northwest (NW), Northeast (NE), and Tibet regions (AUC = 0.97). (a) Baseline map using the complete inventory; (b) Map after randomly removing 50% of landslide points in the target regions (AUC = 0.97); (c) Map after randomly removing 75% of landslide points in the target regions (AUC = 0.97).
